# Supplementary figures and images for: GZMA suppressed GPX4-mediated ferroptosis to improve intestinal mucosal barrier function in inflammatory bowel disease
Source: PubMed Central journal article supplement — Cell Commun Signal. 2024 Oct 4;22:474. doi: 10.1186/s12964-024-01836-y (PMC11451002; doi:10.1186/s12964-024-01836-y), 2024-10-04

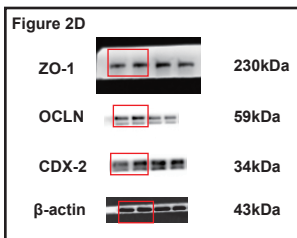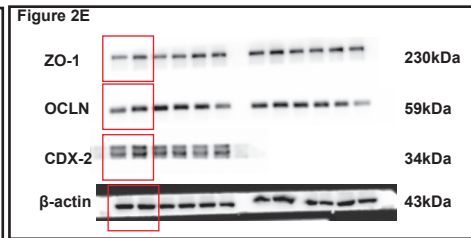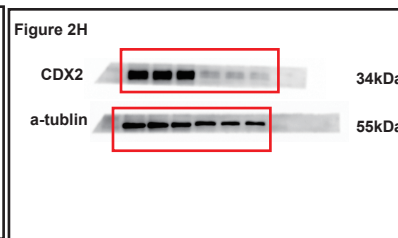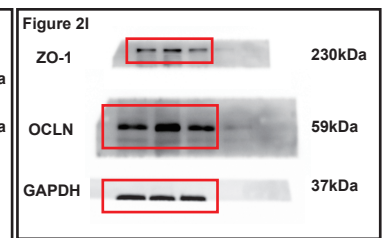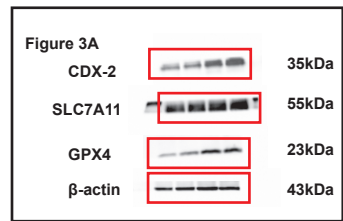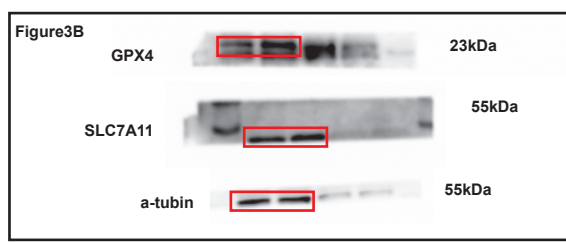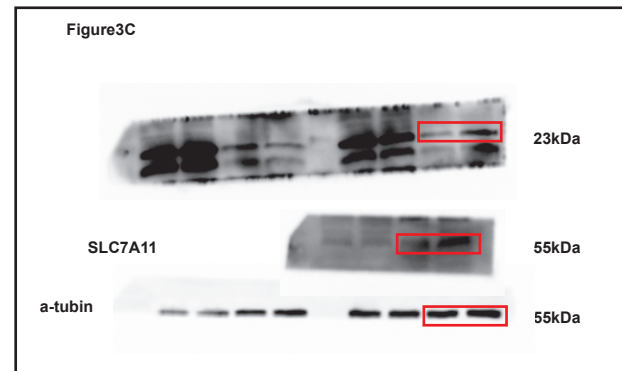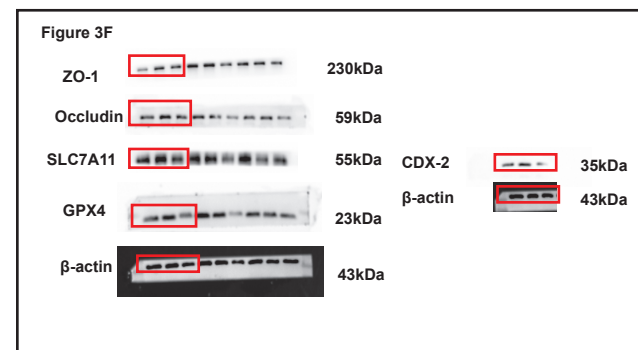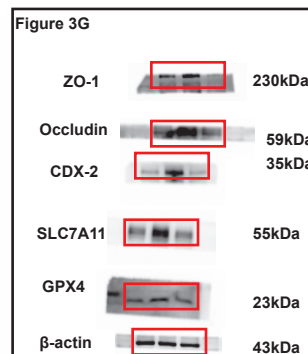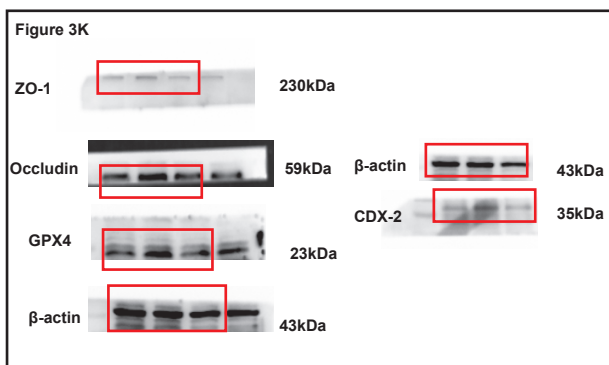

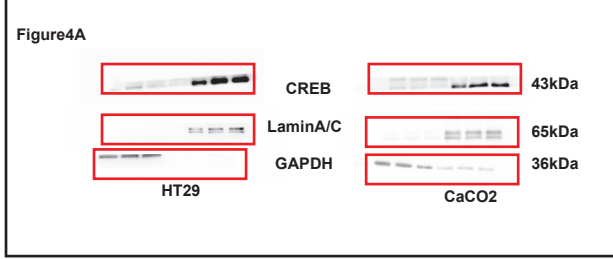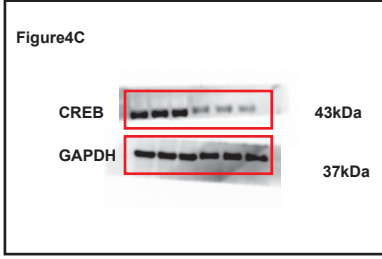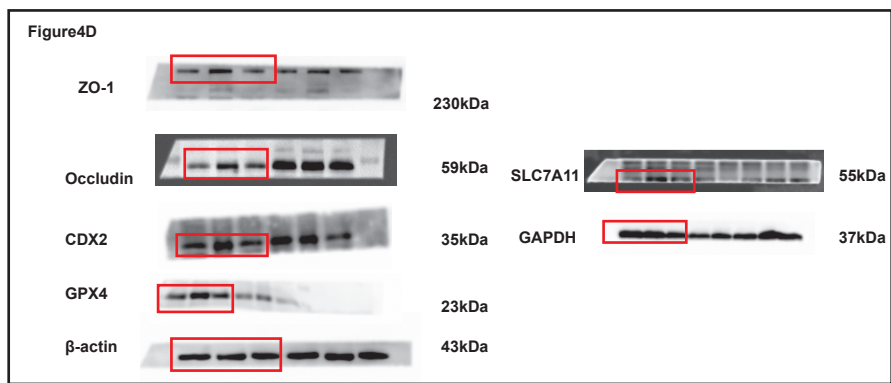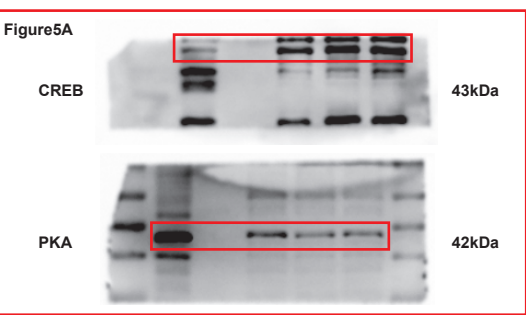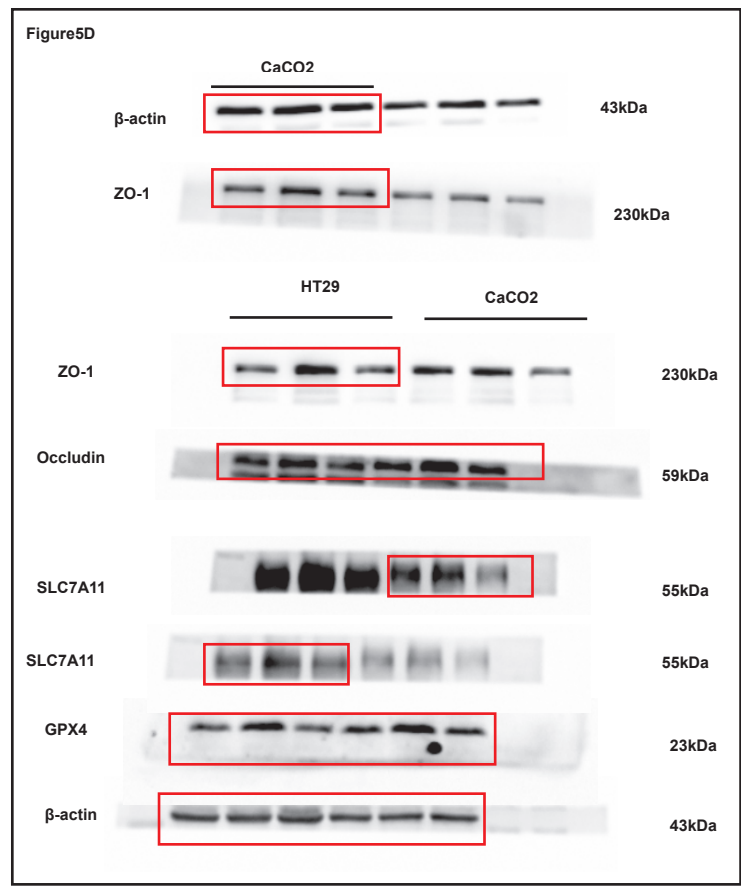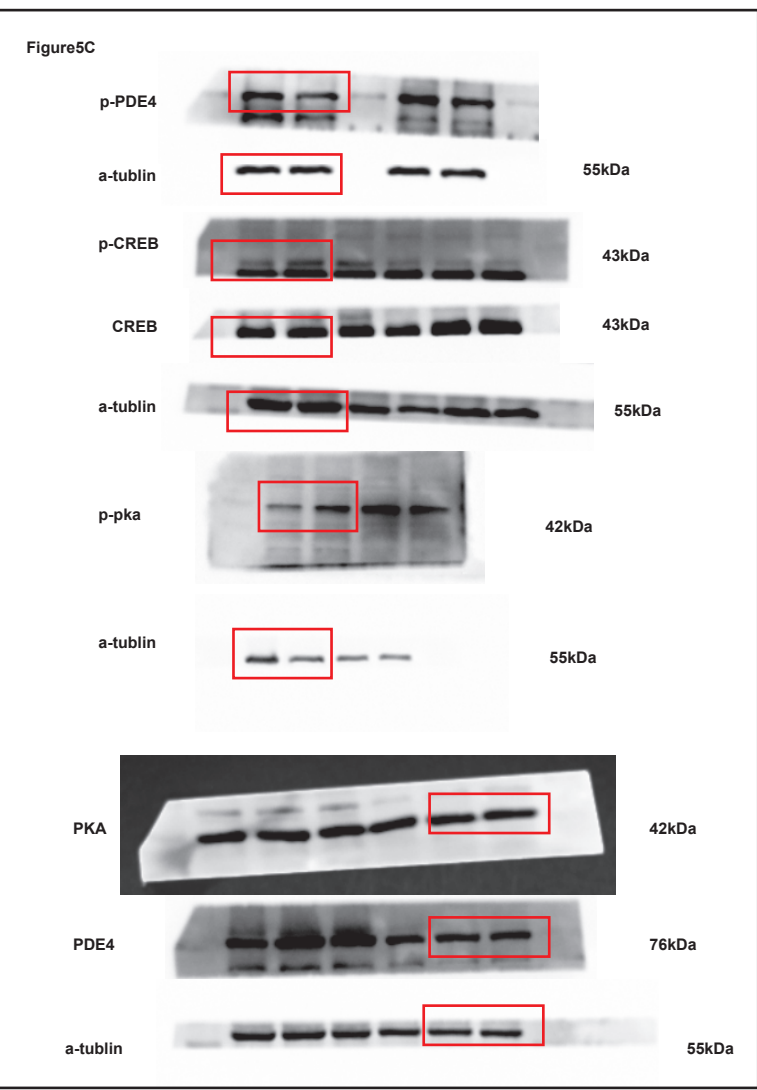

Supplement: 12964_2024_1836_MOESM1_ESM.pdf [file 12964_2024_1836_MOESM1_ESM.pdf]
